# 1 **Advancing North: White-nosed coati's *Nasua narica* Range**

## 2 **Expansion in Arizona**

3

4 Kinley Ragan<sup>1,2</sup> ([kinleyragan@gmail.com](mailto:kinleyragan@gmail.com); orchid: 0000-0002-7534-5420),

5 Faith M. Walker<sup>3</sup> ([faith.walker@nau.edu](mailto:faith.walker@nau.edu); orchid: 0000-0001-8435-4452),

6 Lawrence E. Stevens<sup>4</sup> ([LStevens@musnaz.org](mailto:LStevens@musnaz.org); orchid: 0000-0003-4377-974X),

7 Jan Schipper<sup>1</sup> ([jschipper@phoenixzoo.org](mailto:jschipper@phoenixzoo.org); orchid: 0000-0002-8338-7874)

8

9 <sup>1</sup> Field Conservation Research Department, Arizona Center for Nature Conservation / Phoenix

10 Zoo, Phoenix, Arizona, USA

11 <sup>2</sup> School of Life Sciences, Arizona State University, Tempe, Arizona, USA

12 <sup>3</sup> School of Forestry, Northern Arizona University, Flagstaff, Arizona, USA

13 <sup>4</sup> Museum of Northern Arizona, Flagstaff, Arizona, USA

14

15 Corresponding Author:

16 Kinley Ragan<sup>1</sup>

17 455 N Galvin Pkwy, Phoenix, Arizona, 85008, USA

18 Email address: [kinleyragan@gmail.com](mailto:kinleyragan@gmail.com)

19

20 Keywords: climate change, species distribution, Southwestern U.S., *Nasua narica*,

21 mesocarnivore

22

23 **Abstract**

24 Over the past century, the white-nosed coati (WNC; *Nasua narica*) has expanded its  
25 northernmost range from the United States-Mexico border into northern Arizona. WNC are  
26 medium-sized, opportunistic omnivores that often occur in large groups (“bands”) and forage on  
27 insects, fruits, and small vertebrates. We compiled data from iNaturalist, published literature,  
28 Arizona Game and Fish records, museum collections, personal communications, and our own  
29 camera trap photography to chronicle this range expansion. Historical records documented WNC  
30 populations in mountainous areas along the US-Mexican border but rarely north of Tucson, AZ.  
31 The popularity of using wildlife cameras in both research and recreation, paired with the  
32 advancement of citizen science projects like iNaturalist have generated a vast amount of new  
33 data on species distributions. With this new body of information we report the range of WNC  
34 now occurs over 400 km farther north, extending north of Flagstaff, Arizona. Recent records  
35 include occurrence in ponderosa pine forest that sustain sometimes heavy winter snow – an  
36 environment vastly different from the species’ normal range. The northward expansion of this  
37 meso-carnivore invites many questions about drivers of range expansion, including climate  
38 change, mesopredator release, or simple opportunism. More research into the behavior and  
39 ecology of WNC in the northern extent of their range is needed to guide understanding and  
40 potential future management of this species, its impacts, and prediction of other such range  
41 expansions.

42

43

44

45

46 -

## 47 **Introduction**

48 White-nosed coatis (WNC; *Nasua narica* Linnaeus 1766) are semi-arboreal meso-  
49 carnivores that range from northern South America to southwestern United States (US), with a  
50 recently expanded distribution into northern Arizona. A member of Procyonidae, WNC are the  
51 only coati species found in North America (Hoffmeister 1986, Cuarón et al. 2016). Originally  
52 described by Linnaeus (1766) as *N. narica*, Handley (1966) reported that Linnaeus' description  
53 was of a specimen with a unicolored tail, while Linnaeus' *N. nasua* had a black and white  
54 banded tail. Hoffmeister (1986) reported that the Arizona *N. nasua* were likely the subspecies *N.*  
55 *n. molaris* Merriam, but Hershkovits (1951) considered that subspecies to be synonymous with  
56 *N. n. pallida* Allen. A more detailed taxonomic treatment remains outstanding.

57 The earliest record of WNC in the US was in 1892 at Fort Huachuca, just north of the  
58 US-Mexico border (~31°19'57"N; Wallmo and Gallizioli 1954). At that time, it was considered  
59 a rare sighting. WNC were established in the Chiricahua and Huachuca Mountain ranges during  
60 the early 20<sup>th</sup> century (Cahalane 1939). However, as extensive mining and settlement took place  
61 across southeastern Arizona, sightings of WNC were still considered rare, suggesting at least that  
62 WNCs were rarely seen (Wallmo and Gallizioli 1954). A deputy game warden of the Chiricahua  
63 Mountains, Bill Lee, called WNC "infrequent" at that time, referring to it as the "Mexican  
64 cholugo" (Cahalane 1939).

65 By 1940, breeding WNC populations were well-described in southeastern AZ. Taber  
66 (1940) wrote that a "northern invasion" of WNC was occurring, and in 1934 WNC was added to  
67 the US mammals list because it was known to occur "sporadically on the American side of the  
68 Mexican border" (Taylor 1934, Taber 1940). Thereafter, bands of WNC began being commonly  
69 noted in the Chiricahua, Huachuca, Patagonia, and Tumacacori mountains (latitudes ~

70 31°29'20.72"; Cahalane 1939, Wallmo and Gallizioli 1954, Hall and Kelson 1959). By 1954, the  
71 local community of the Huachuca Mountains began to view WNC as a nuisance species because  
72 of injuries to dogs, depredation on chickens, and foraging on orchard fruit (Wallmo and  
73 Gallizioli 1954).

74 Since then, the range of WNC has continued to expand northward. More bands have  
75 become established at northerly latitudes, such as the San Carlos Indian Reservation (Kaufmann  
76 et al. 1976). Hoffmeister (1986) reported WNC from Walnut Canyon National Monument and  
77 Petrified Forest National Park; however, there are few further publications recognizing this  
78 expansion. In 2008, the International Union for Conservation of Nature and Natural Resources  
79 (IUCN) listed WNC habitat as following the oak woodlands of the southeastern region of the  
80 United States, with WNC mainly in the Chiricahua and Huachuca Mountains (~31°33'18.58"N)  
81 because of their affinity with "hardwood riparian canyons over 1,400 m" (Samudio et al. 2008).  
82 In 2016, the updated IUCN range of WNC was drawn north of Interstate 40 in Flagstaff, AZ  
83 (~35°11'51.93"N), showing an expansion from their records in 2008 to 2016 (Cuaron et al.  
84 2016).

85 Today, WNCs have been consistently recorded in and north of Flagstaff, Arizona, a city  
86 at a longitude of ~35°11'51.94"N (about 400 km north of the US-Mexico border) and at an  
87 elevation of 2100 m, a substantial climate difference from their primary range (Cuaron et al.  
88 2016). These reports of coati north of the southern margin of the Colorado Plateau stimulated  
89 our inquiry into historical and recent records of their occurrence and changes in distribution. We  
90 conducted a review of databases, literature, and museum specimens to document range changes  
91 for WCN. Our records illuminate this species expansion into Arizona over the past century, as  
92 well as confirming the northernmost distribution of the species.

## 93 **Methods**

94           To track occurrence records across time for WNC we collated data from 6 different  
95 sources: iNaturalist, peer-reviewed literature, Arizona Game and Fish Department's (AZGF)  
96 Heritage Data Management System (HDSM) records, Museum of Northern Arizona collections,  
97 personal communications, and opportunistic camera trap photographs. For all records we  
98 collected the year of sighting, latitude, longitude, individuals sighted (i.e., band or a single  
99 individual), and photographic proof of presence. Only records with complete information were  
100 included. When roadkill or WNC tracks were recorded, we categorized these as a single  
101 individual.

102           iNaturalist is a citizen scientist project that encourages citizens with a cell phone to  
103 photograph and document species around the world. These web-based platforms are commonly  
104 used as a tool to document species distribution, phenology, and seasonal events, among many  
105 other observations. Because records are georeferenced, have attached photographs, and are  
106 reviewed by professionals to earn the title of 'research grade', their authenticity is confirmed. We  
107 downloaded 322 research grade iNaturalist results in March 2021 with the parameters of "*Nasua*  
108 *narica*" and the filter of "Arizona" were applied (GBIF 2021). The timing of records ranged  
109 from 1999 to 2021.

110           To gain historical and peer-reviewed context of coati presence in Arizona we used  
111 Google Scholar and the search terms "*Nasua narica*" and "Arizona" to explore the literature.  
112 Over 700 results were returned; however, fewer than 50 mentioned WNC sightings in the state of  
113 Arizona, and only 38 of them were unique records. Publications and accounts dated from early  
114 1892 to October 2019. When specific coordinates were not provided, an estimated geographic

115 reference from the paper was used. If an account was repeated in the literature, only the initial  
116 publication was recorded.

117 We secured Heritage Data Management System (HMS) records of confirmed WNC  
118 sightings by AZGF and US Fish and Wildlife Service biologists from 1983 to 2018.  
119 Additionally, wildlife camera trap photos with geographic coordinates from the Verde were  
120 obtained from wildlife biologists for photographic evidence of WNC. Lastly, several personal  
121 communications from reliable biologists were included of WNC sightings in northern Arizona.

## 122 **Results**

123 We documented 626 records of coati sightings in Arizona from 1892 to 2021, including:  
124 322 from iNaturalist; 242 from HDMS reports; 39 from peer-reviewed literature (Table 1); 16  
125 from wildlife cameras; 4 Museum of Northern Arizona specimens; and 3 from personal  
126 communications. The Museum of Northern Arizona specimens expanded our WNC distribution  
127 and history data. An adult male WNC specimen (MNA Z9-698) was collected on the Babbitt  
128 Brothers Spur Ranch at the edge of Anderson Mesa near Flagstaff, at an elevation of 1825 m on  
129 30 January 1955. An adult male WNC specimen was recovered as a salvaged roadkill 29 km NW  
130 of Flagstaff on Highway 180 at 35°20'46.86"N on 8 July 2016. At 2,437 m, this specimen  
131 appears to be the highest elevation reported for WNC in Arizona. This specimen is curated at the  
132 Museum of Northern Arizona as MNA Z9-5512. Additional observations and photographs of  
133 WNC and their tracks were taken along the Rio de Flag Canyon at MNA, and at Walnut Canyon  
134 National Monument during the winter of 2015 and 2016.

135 Most of the literature records in the early 1900s were of individuals (e.g., Taylor 1934,  
136 Cahalane 1939, Wallmo and Gallizioli 1954), suggesting that only dispersing males were moving  
137 northward into new territories at that time (Table 1, Fig. 1). However, by the mid-1900s

138 sightings of bands became more prevalent, although those records remained closer to the US-  
139 Mexico border (Table 1). Locations used from iNaturalist confirmed observations farther north  
140 than historically recorded (Fig. 1). In 2015, WNC records at latitudes north of Phoenix began  
141 appearing more commonly (Fig. 2). All northern sightings were of individuals, until 2018 when  
142 records of bands were reported south of Sedona, Arizona at a latitude of 34°43'35.98"N (GBIF  
143 2021). In 2014, a research project along the Verde River (latitude: ~ 34°2'36.78"N) recovered  
144 numerous camera trap photos of WNC, primarily in sites along river canyons (Fig. 3).  
145 Additionally, photographs of WNC along the Mogollon rim in Payson, Arizona were  
146 documented in 2017 and 2018 (Fig. 4). We received verified photos of an individual WNC from  
147 citizen scientists at two locations near houses within the city of Flagstaff (latitudes: 35°13'45.98"  
148 N and 35°13'17.47"N). Lastly, in Fall of 2019, two additional WNC sightings were reported by  
149 biologists in northern Arizona: one at Bear Lake Campground (latitude: 34°17'2.51"N) and the  
150 other near upper Lake Mary (latitude: 35°4'51.67"N) (Haight personal communication 2019,  
151 Tellez personal communication 2019, respectively).

## 152 **Discussion**

153         It comes as no surprise that WNC, a versatile, highly adaptable, social omnivore, whose  
154 males disperse and are solitary between breeding seasons, is readily capable of colonizing new  
155 territory. Additionally, the geography of central Arizona lends itself well as a conduit for  
156 northern expansion, as hardwood river canyons connect higher and lower elevations through  
157 riparian habitat corridors (Frey et al. 2013). Our data indicate that WNC are now occurring  
158 farther north more frequently.

159         The opportunistic ecology and diet of WNC have likely facilitated their ability to expand  
160 into new regions. WNC occur in bands averaging 12 individuals, typically consisting of females

161 with their young, while males are solitary or join a small bachelor troop (Smythe 1970, Hass and  
162 Valenzuela 2002). Bachelor males only interact with females during the mating season in April,  
163 and young are born in June (Smythe 1970, Hoffmeister 1986, Trovoti et al. 2010, Cuaron et al.  
164 2016, Emmons and Helgen 2016). Outside of the mating season, adult WNC males disperse to  
165 find new territories, which enables range extension. Additionally, WNC are omnivorous,  
166 consuming insects, fruits, seeds, and forest litter invertebrates, and occasionally small- to  
167 medium-sized vertebrates (Wallmo and Gallizioli 1954, Smythe 1970, Kaufmann et al. 1976,  
168 Gompper 1995, Valenzuela 1998). It is probable that this expansive diet has facilitated their  
169 ability to exist in different habitats, adapting to local food sources as resource conditions allow  
170 (Kaufmann et al. 1976, McColgin et al. 2003, McColgin et al. 2018).

171 WNC have high affinity to riparian areas, especially in dry regions, which provide  
172 discrete corridors for their expansion into northern regions (Hoffmesiter 1986; Frey et al. 2013).  
173 While they have been documented in a wide array of habitats, WNC most often occupy stands of  
174 pine forest (*Pinus*), oak-pine woodland (*Quercus*), chaparral, sycamore (*Plantanus*), walnut  
175 (*Juglans*), maple (*Acer*), and other coniferous forests between 1,400 and 2,450 m elevation  
176 (Wallmo and Gallizioli 1954, Kaufmann et al. 1976, Frey et al 2013). Riparian areas provide  
177 diverse dietary and habitat needs, including: tree canopy cover, presence of water, availability of  
178 food resources, and seasonal dispersal, particularly in more arid river corridors, like the Verde  
179 River and its many tributaries (Hass 2002, Valenzuela and Ceballos 2000; Frey et al. 2013).  
180 WNC have been recorded in Organ Pipe Cactus National Monument at what has been described  
181 as their “lowest, driest, and hottest” reported location, with only 186 mm/yr of precipitation  
182 (Kaufmann et al. 1976).



183 WNC are one of many Mexican-Neotropical species moving northwards as climate  
184 changes, including invertebrates and other vertebrates (Brown and Davis 1995). For example, all  
185 butterfly species added to the Grand Canyon National Park list in the past 70 years, and which  
186 are native to North America, have been Mexican-Neotropical species (Garth 1950, Stevens  
187 2012). A similar case may be that of the Central American Masked Clubskimmer dragonfly  
188 *Brechmorhoga pertinax*, which has been reported breeding in northern Arizona (Stevens and  
189 Bailowitz 2009). Several bird species native to North America also are undergoing northward  
190 range expansion, such as Great-tailed Grackle *Quiscalus mexicanus* (Wehtje 2003). Other non-  
191 flying mammals expanding their ranges northward in the US Southwest (in addition to coyote  
192 *Canis latrans*) include collared peccary *Pecari tajacu* and American hog-nosed skunk *Conepatus*  
193 *leuconotus leuconotus* (Holton et al. 2021). Peccary range expansion appears to be related to the  
194 slightly warmer winter temperatures to which the Southwest is now subject (Bender et al. 2014),  
195 and both peccary and hog-nosed skunk have been detected on the north side of the Colorado  
196 River in the Grand Canyon (Stevens 2013; Holton et al. 2021). Too few distributional data are  
197 available to understand the ranges of many bats, but the phyllostomid Mexican long-tongued bat  
198 *Choeronycteris mexicana* has been detected in Grand Canyon National Park (Stevens 2013).  
199 Lastly, jaguar *Panthera onca* have recently been documented moving between the borderlands  
200 into southeastern Arizona along the same approximate route as WNC (Culver et al. 2016). Thus,  
201 WNC appears to be one of many Mexican-Neotropical taxa expanding their ranges northward  
202 into the southwestern US.

203 During the last century, the Arizona landscape has changed dramatically (Hutchinson et  
204 al. 2000, Jenerette and Wu 2001, Turner et al. 2003). Humans have altered habitat conditions,  
205 allowing allowed WNC to cross some of the arid landscape gaps that previously restricted them

206 to southern Arizona. Wildlife populations and habitat availability also have greatly changed  
207 during this interval. With fewer large carnivores and less intact riparian forest cover,  
208 mesocarnivore release may have occurred, allowing WNC to proliferate and expand their range.

209 Today, WNC populations in the Chiricahua and Huachuca Mountains are well-  
210 established and often attract public attention in the Chiricahua National Monument, where they  
211 are seen daily by visitors. Continued individual sightings in Flagstaff north of Interstate 40, and  
212 with bands documented at higher latitudes indicate that WNC will continue to move northward.  
213 WNC are well studied in Central America; however, data on their behavior and ecology at the  
214 northernmost extent of their range are outstanding. Although we can speculate on driving factors,  
215 we have no direct evidence to suggest why they are expanding northward now. If the current  
216 trends observed in our data continue, WNC may soon disperse to Grand Canyon National Park  
217 and the Colorado River corridor, and other suitable habitats in northern Arizona. Such changes  
218 may be of interest to land managers, who might see WNC as welcome guests or regard them as  
219 invading “southern pests”.

220 Dispersal and range expansion are natural processes; however, relatively rapid range  
221 expansions also can indicate larger issues that may warrant scientific and managerial attention.  
222 Further research is needed to understand WNC habitat selection and interactions with northern  
223 species. Cuarón et al. (2016) stated that large-scale habitat loss threatens US populations of  
224 WNC, and warn that US populations may be becoming genetically isolated from Mexican  
225 populations. To better understand the potential impact of WNC on other wildlife and WNC  
226 movement corridors, camera trapping, animal collaring, genetic assessments of population  
227 connectivity, and diet assessment should be conducted to develop information about their  
228 distribution, home range size, and behavior. However, in the short term it will be important to

229 conduct research on the mechanisms driving WNC range expansion, and how their presence and  
230 occurrence in developed areas might impact existing management actions. Such data can provide  
231 the basis for a predictive habitat model to forecast WNC movement and habitat use, and to  
232 improve prediction of adaptive management options for future vertebrate communities (e.g., Frey  
233 et al. 2013). With global climate change continuing to reshape southwestern landscapes, more  
234 information on transient and rapidly adapting species like WNC and their responses to these  
235 changes is essential for understanding the future of southwestern biotic assemblages.

236

### 237 **ACKNOWLEDGEMENTS**

238 We thank the Museum of Northern Arizona for supporting L. Stevens' work, and Janet  
239 Gillette for assistance with specimen data from the MNA collection. We also thank Arizona  
240 Game and Fish's Heritage Data Management department for their contribution of records. Lastly,  
241 we thank the field volunteers (Chelsey Tellez, Ray Tellez, Samantha Lloyd, and Sandy Leander)  
242 who helped manage and retrieve cameras and our pilot from the Arizona Pilots Association  
243 Tommy Thomason.

244

### 245 **LITERATURE CITED**

246 Arizona Heritage Data Management System. 2019. *Nasua narica*. Arizona Game and Fish  
247 Department.  
248 Bender, L. C., Weisenberger, M. E. & Rosas-Rosas, O. C. 2014. Occupancy and habitat  
249 correlates of javelins in the southern San Andres Mountains, New Mexico. *Journal of*  
250 *Mammalogy* 95:1-8.

- 251 Brown, D. E., & Davis, R. 1995. One hundred years of vicissitude: terrestrial bird and mammal  
252 distribution changes in the American Southwest. In *General Technical Report RM-GTR-*  
253 *264: Biodiversity and the Management of the Madrean Archipelago: The Sky Islands of*  
254 *Southwestern United States and Northwestern Mexico*: 231-244. DeBano, L.F., Gottfried,  
255 G.J., Hamre, R.H., Edminster, C.B., Ffoiliott, P.F. and Ortega-Rubio, A. (Eds). Tucson,  
256 Arizona: USDA Forest Service.
- 257 Cahalane, V. 1939. Mammals of the Chiricahua Mountains, Cochise County, Arizona. *Journal of*  
258 *Mammalogy* 20: 418-440.
- 259 Cuarón, A. D., Helgen, K., Reid, F., Pino, J. & González-Maya, J. F. 2016. *Nasua narica*. The  
260 IUCN Red List of Threatened Species 2016.
- 261 Culver, M. 2016. Jaguar surveying and monitoring in the United States (ver. 1.1, November  
262 2016). U.S. Geological Survey Open-file Report 2016-1095.
- 263 Emmons, L. & Helgen, K. 2016. *Nasua nasua*. The IUCN Red List of Threatened Species 2016:  
264 <http://dx.doi.org/10.2305/IUCN.UK.2016-1.RLTS.T41684A45216227.en>
- 265 Frey, J. K., Lewis, J. C., Guy, R. K. & Stuart, J. N. 2013. Use of anecdotal occurrence data in  
266 species distribution models: an example based on the white-nosed coati (*Nasua narica*) in  
267 the American Southwest. *Animals* 3: 327-348
- 268 Garth, J. S. 1950. Butterflies of Grand Canyon National Park. Grand Canyon Natural History  
269 Association Bulletin 11, Grand Canyon.
- 270 GBIF (Global Biodiversity Information Facility) 2021. 2021 Occurrence for *Nasua narica*.  
271 <<https://doi.org/10.15468/dl.86pgce>>. Downloaded on 16 March 2021.
- 272 Gompper, M. E. 1995. *Nasua narica*. Mammalian Species. *The American Society of*  
273 *Mammalogists* 487: 1-10.

- 274 Hall, E. R. & Kelson, K. R. 1959. The Mammals of North America. New York: The Ronald  
275 Press Company.
- 276 Handley, C. O. Jr. 1966. Checklist of the mammals of Panama. In Wenzel, R.L. and V.J. Tipton,  
277 eds. Ectoparasites of Panama. Chicago: Field Museum of Natural History.
- 278 Hass, C. 2002. Home-range dynamics of white-nosed coatis in southeastern Arizona. *Journal of*  
279 *Mammalogy* 8:934-946.
- 280 Hass, C. & Valenzuela, D. 2002. Anti-predator benefits of group living in white-nosed coatis  
281 (*Nasua narica*). *Behavioral Ecology and Sociobiology* 51: 570-578.
- 282 Hershkovitz, P. 1951. Mammals from British Honduras, Mexico, Jamaica and Haiti. *Fieldiana*  
283 *Zoology* 31:547-569.
- 284 Holton, B., Theimer, T. & Ironside, K. 2021. First records and possible range extension of the  
285 American Hog-nosed Skunk into Grand Canyon National Park, U.S.A. *Small Carnivore*  
286 *Conservation* 59: e59001.
- 287 Hoffmeister, D. F. 1986. Mammals of Arizona. Tucson: University of Arizona Press.
- 288 Hutchinson, C. F., Unruh, J. D. & Bahre, C. J. 2000. Land use vs. climate as causes of vegetation  
289 change: a study in SE Arizona. *Global Environmental Change* 10: 47-55.
- 290 Jenerette, G. D. & Wu, J. 2001. Analysis and simulation of land-use change in the central  
291 Arizona-Phoenix region, USA. *Landscape Ecology* 16: 611-626.
- 292 Kaufmann, J. H., Lanning, D. V. & Poole, S. E. 1976. Current status and distribution of the coati  
293 in the United States. *Journal of Mammalogy* 57: 621-637.
- 294 Lanning, D. V. 1976. Density and movements of the coati in Arizona. *Journal of Mammalogy*  
295 57:609-611.

- 296 Linnaeus, C. 1766. *Systema naturae per regna tria naturae, Secundum classes, ordines, genera,*  
297 *species, cum characteribus, differentiis, synonymis, locis.* 12th Edition. Volume 1, Part  
298 1. Stockholm.
- 299 McColgin, M. E., Brown, E. J., Bickford, S. M., Eilers, A. L. & Koprowski, J. L. 2003. Use of  
300 century plants (*Agave palmeri*) by coatis (*Nasua narica*). *The Southwestern Naturalist*  
301 48: 722-725.
- 302 McColgin, M. E., Koprowski, J. & Waser, P. 2018. White-nosed coatis in Arizona: tropical  
303 carnivores in a temperature environment. *Journal of Mammalogy* 99:1-11.
- 304 Pratt, J. 1962. Establishment and trends of coati-mundi in the Huachucas. *Modern Game*  
305 *Breeding* 32:10-11.
- 306 Risser, A. C. 1963. A study of the coati mundi *Nasua narica* in Southern Arizona (Master's  
307 thesis). Retrieved from University of Arizona database. (accessed September 2019).
- 308 Salomonson, M. 1973. The mammals of Walnut Canyon National Monument. *Figureau* 46: 19-  
309 24.
- 310 Samudio, R., Kays, R., Cuaron, A. D., Pino, J. L. & Helgen, K. 2008. *Nasua narica*. The IUCN  
311 Red List of Threatened Species 2008: e.T41683A10510873.
- 312 Smythe, N. 1970. The adaptive value of the social organization of the coati (*Nasua narica*).  
313 *Journal of Mammalogy* 51:818-820.
- 314 Stevens, L. E. 2012. The biogeographic significance of a large, deep canyon: Grand Canyon of  
315 the Colorado River, Southwestern USA. In Stevens, L.E., ed. *Global Advances in*  
316 *Biogeography*. InTech Publications, Rijeka, pp. 169-208. Doi: 10.5772/32527.
- 317 Stevens, L. E. 2013. *The Colorado River in Grand Canyon: river map & guide*. Grand Canyon  
318 Wildlands Council, Inc., Flagstaff.

- 319 Stevens, L. E. & Bailowitz, R. 2009. Odonata biogeography in the Grand Canyon ecoregion,  
320 Southwestern USA. *Annals of the Entomological Society of America* 102: 261-274.
- 321 Taber, F. W. 1940. Range of the coati in the United States. *Journal of Mammalogy* 21:11-14.
- 322 Taylor, W. P. 1934. Coati added to the list of United States mammals. *Journal of Mammalogy*  
323 15:317-318.
- 324 Trovati, R., Alves de Brito, B. & Duarte, J. M. B. 2010. Habitat use and home range of brown-  
325 nosed coati *Nasua nasua* in the Brazilian Cerrado biome. *Revista de Biologia Tropical*  
326 58:1069-1077.
- 327 Turner, R. M., Webb, R. H., Bowers, J. E. & Hastings, J. R. 2003. The Changing Mile Revisited:  
328 An Ecological Study of Vegetation Change with Time in the Lower Mile of an Arid and  
329 Semiarid Region. University of Arizona Press, Tucson.
- 330 Valenzuela, D. 1998. Natural history of the white-nosed coati, *Nasua narica*, in a tropical dry  
331 forest of western Mexico. *Revista Mexicana de Mastozoologia* 3:26-44.
- 332 Valenzuela, D. & Ceballos, G. 2000. Habitat selection, home range, and activity of the white-  
333 nosed coati (*Nasua narica*) in a Mexican tropical dry forest. *Journal of Mammalogy* 81:  
334 810-819.
- 335 Wallmo, O. & Gallizioli, S. 1954. Status of the coati in Arizona. *Journal of Mammalogy* 35:48-  
336 54.
- 337 Wehtje, W. 2003. The range expansion of the great-tailed grackle (*Quiscalus mexicanus* Gmelin)  
338 in North America since 1880. *Journal of Biogeography* 30:1593-1607.
- 339
- 340
- 341

342

## Tables & Figures

343 **Table 1: Records from literature of white-nosed coati *Nasua narica* in Arizona, United**  
 344 **States of America.**

| Year | Latitude (N)     | Longitude (W)       | # Individuals | Data Type | Citation                    |
|------|------------------|---------------------|---------------|-----------|-----------------------------|
| 1892 | 31° 33' 18.576"  | - 110° 20' 58.848"  | 1             | Photo     | Wallmo & Gallizioli 1954    |
| 1908 | 32° 22' 29.9532" | - 109° 3' 24.2172"  | 1             | Testimony | Cahalane 1939 (Bailey 1931) |
| 1914 | 31° 24' 56.2608" | - 110° 43' 48.7812" | 1             | Photo     | Wallmo & Gallizioli 1954    |
| 1924 | 31° 29' 20.724"  | - 110° 24' 32.2992" | 1             | Photo     | Taylor, 1934                |
| 1932 | 31° 38' 39.0264" | - 109° 10' 16.6872" | 1             | Photo     | Cahalane 1939               |
| 1934 | 33° 29' 53.7216" | - 111° 27' 53.4744" | 1             | Testimony | Taylor 1934                 |
| 1939 | 31° 27' 42.9408" | - 111° 14' 13.254"  | band          | Testimony | Taber 1940                  |
| 1940 | 33° 38' 14.9784" | - 109° 19' 49.4004" | 1             | Testimony | Taber 1940; Taylor 1934     |
| 1942 | 32° 5' 15.6732"  | - 112° 54' 24.3756" | 1             | Testimony | Kaufmann et al. 1976        |
| 1949 | 31° 29' 20.724"  | - 110° 24' 32.2992" | band          | Testimony | Wallmo & Gallizioli 1954    |
| 1950 | 31° 21' 2.8764"  | - 110° 16' 51.6864" | band          | Testimony | Risser 1963                 |
| 1953 | 31° 27' 43.4412" | - 110° 58' 53.58"   | band          | Testimony | Fred Fendig, Risser 1963    |
| 1954 | 32° 42' 5.1372"  | - 109° 52' 17.6916" | 1             | Testimony | Wallmo & Gallizioli 1954    |
| 1955 | 31° 22' 59.0232" | - 110° 35' 7.7136"  | band          | Testimony | Carl Yeager, Risser 1963    |
| 1960 | 31° 27' 54.1872" | - 110° 17' 5.3484"  | band          | Testimony | William Brown, Risser 1963  |
| 1960 | 31° 30' 57.456"  | - 110° 33' 32.922"  | band          | Testimony | Don Havluk, Risser 1963     |
| 1960 | 31° 25' 59.3508" | - 111° 8' 52.386"   | 1             | Testimony | Risser 1963                 |
| 1960 | 31° 29' 46.7196" | - 110° 51' 44.352"  | band          | Testimony | Charles Morgan, Risser 1963 |
| 1961 | 31° 29' 20.724"  | - 110° 24' 32.2992" | band          | Testimony | Sewell Goodwin, Risser 1963 |
| 1961 | 31° 21' 2.8764"  | - 110° 16' 51.6864" | 1             | Photo     | Risser 1963                 |
| 1961 | 31° 25' 37.3476" | - 110° 17' 28.0428" | band          | Testimony | James Holt, Risser 1963     |
| 1962 | 31° 33' 18.576"  | - 110° 20' 58.848"  | band          | Testimony | Pratt 1962                  |
| 1962 | 31° 39' 24.84"   | - 110° 52' 9.5952"  | band          | Photo     | Risser 1963                 |
| 1962 | 31° 27' 43.4412" | - 110° 58' 53.58"   | band          | Photo     | Risser 1963                 |
| 1970 | 32° 35' 30.4764" | - 109° 50' 59.5428" | band          | Testimony | Kaufmann et al. 1976        |
| 1973 | 35° 10' 18.6888" | - 111° 30' 34.4736" | 1             | Testimony | Salomonson 1973             |
| 1974 | 32° 50' 45.3948" | - 110° 38' 11.4936" | 1             | Testimony | Kaufmann et al. 1976        |
| 1974 | 32° 1' 21.432"   | - 109° 21' 51.7896" | band          | Photo     | Lanning 1976                |
| 1975 | 32° 50' 45.3948" | - 110° 38' 11.4936" | band          | Testimony | Kaufmann et al. 1976        |
| 1976 | 31° 47' 13.6428" | - 111° 34' 56.6292" | band          | Photo     | Kaufmann et al. 1976        |
| 1976 | 33° 55' 3.18"    | - 109° 28' 32.1744" | band          | Testimony | Kaufmann et al. 1976        |
| 1976 | 33° 54' 38.502"  | - 109° 35' 7.5732"  | 1             | Testimony | Kaufmann et al. 1976        |
| 2000 | 31° 34' 59.9988" | - 110° 25' 0.0012"  | band          | Photo     | Hass 2002                   |
| 2000 | 31° 34' 59.9988" | - 110° 25' 59.9988" | band          | Photo     | Hass and Valenzuela 2002    |
| 2004 | 32° 1' 21.432"   | - 109° 21' 51.7896" | band          | Photo     | McColgin et al. 2017        |
| 2016 | North of         | I-40                | 1             | Testimony | Cuaron et al. 2016          |

345



346 Fig. 1. Latitudinal expansion of white-nosed coati by year (1892 to 2021). Each data point  
347 indicates either an individual or a band of coatis from one of six data sources: Heritage  
348 Data Management System, iNaturalist, literature, Museum of Northern Arizona, personal  
349 communications, and wildlife camera photos.

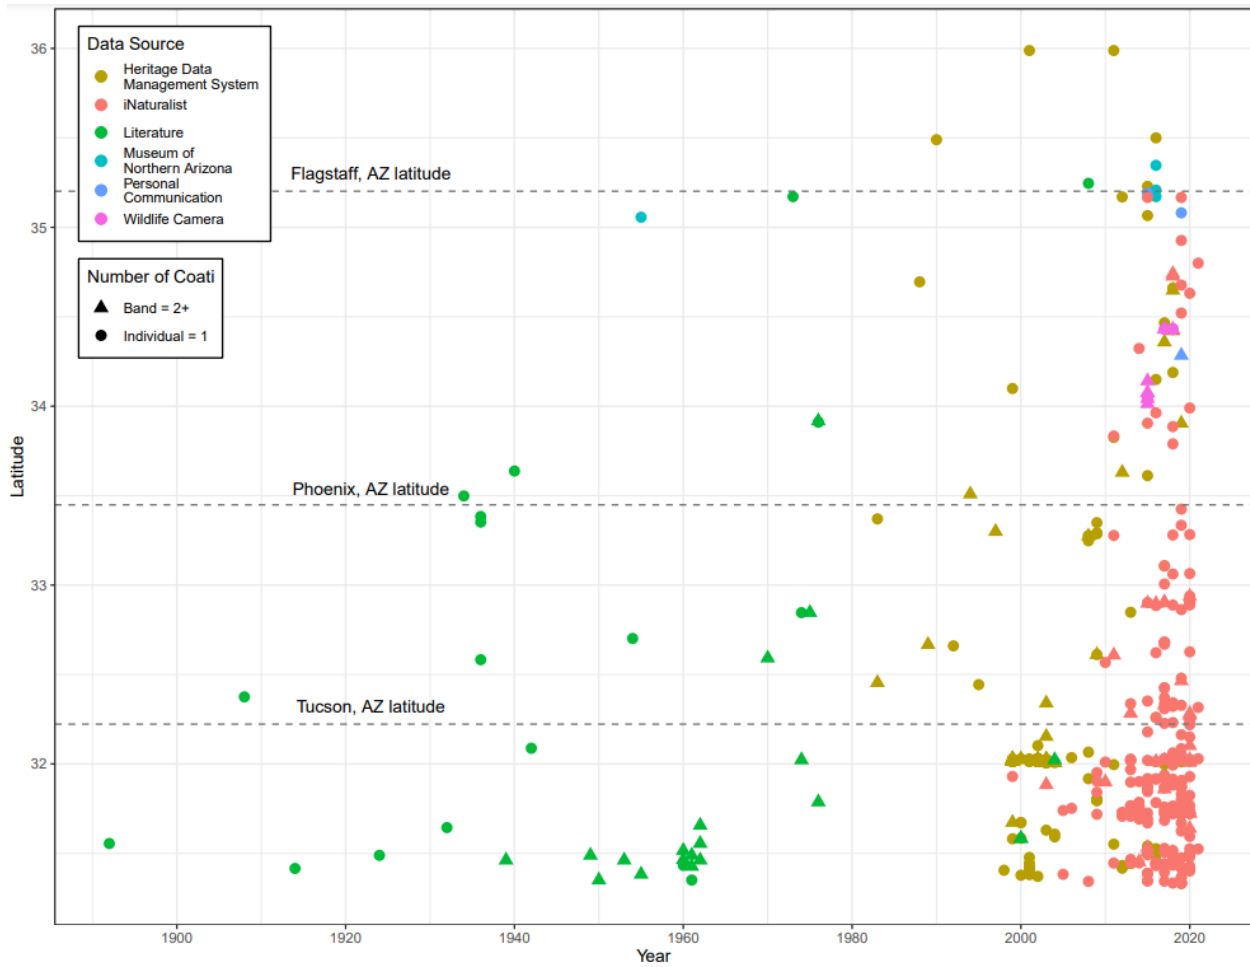

350

351

352

353

354

355

356 Fig. 2. Coordinates of white-nosed coati in Arizona from 1892 – 2021. Each data point indicates  
357 a documented sighting of one or more white-nosed coatis in Arizona based on records  
358 from literature, iNaturalist, Heritage Data Management System, Museum of Northern  
359 Arizona, personal communications, and wildlife camera photos.

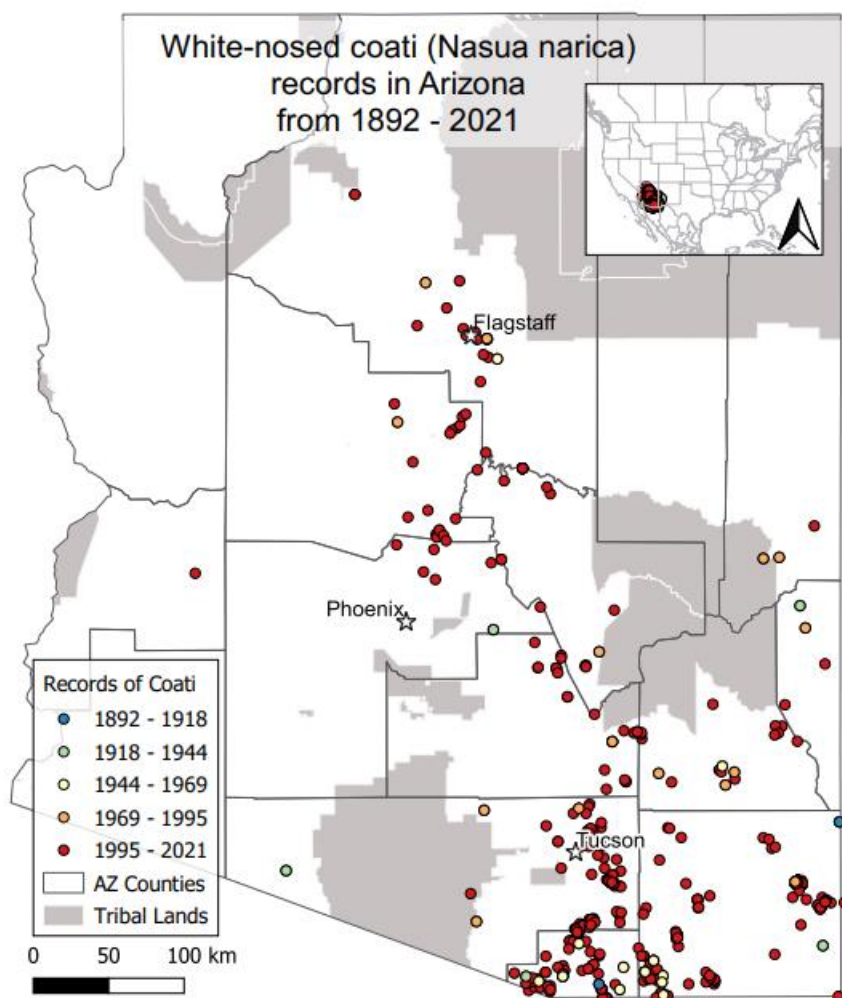

360

361

362

363

364

365 Fig. 3. Wildlife camera photo of an individual white-nosed coati along the Verde River, Arizona  
366 in 2015.

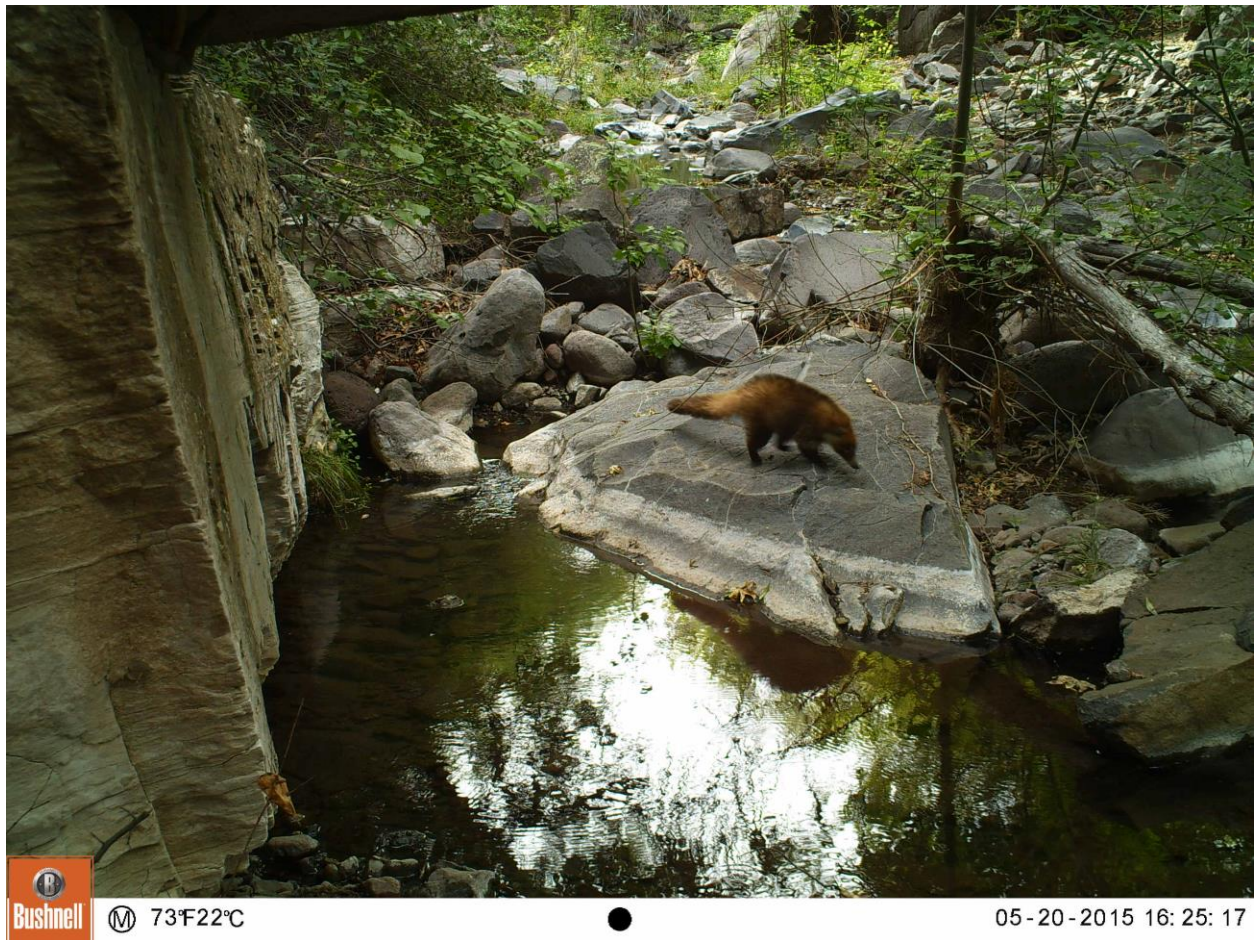

367

368

369

370

371

372

373

374

375



376 Fig. 4. A band of 5 white-nosed coatis along the Highline Trail in Payson, Arizona in 2018.

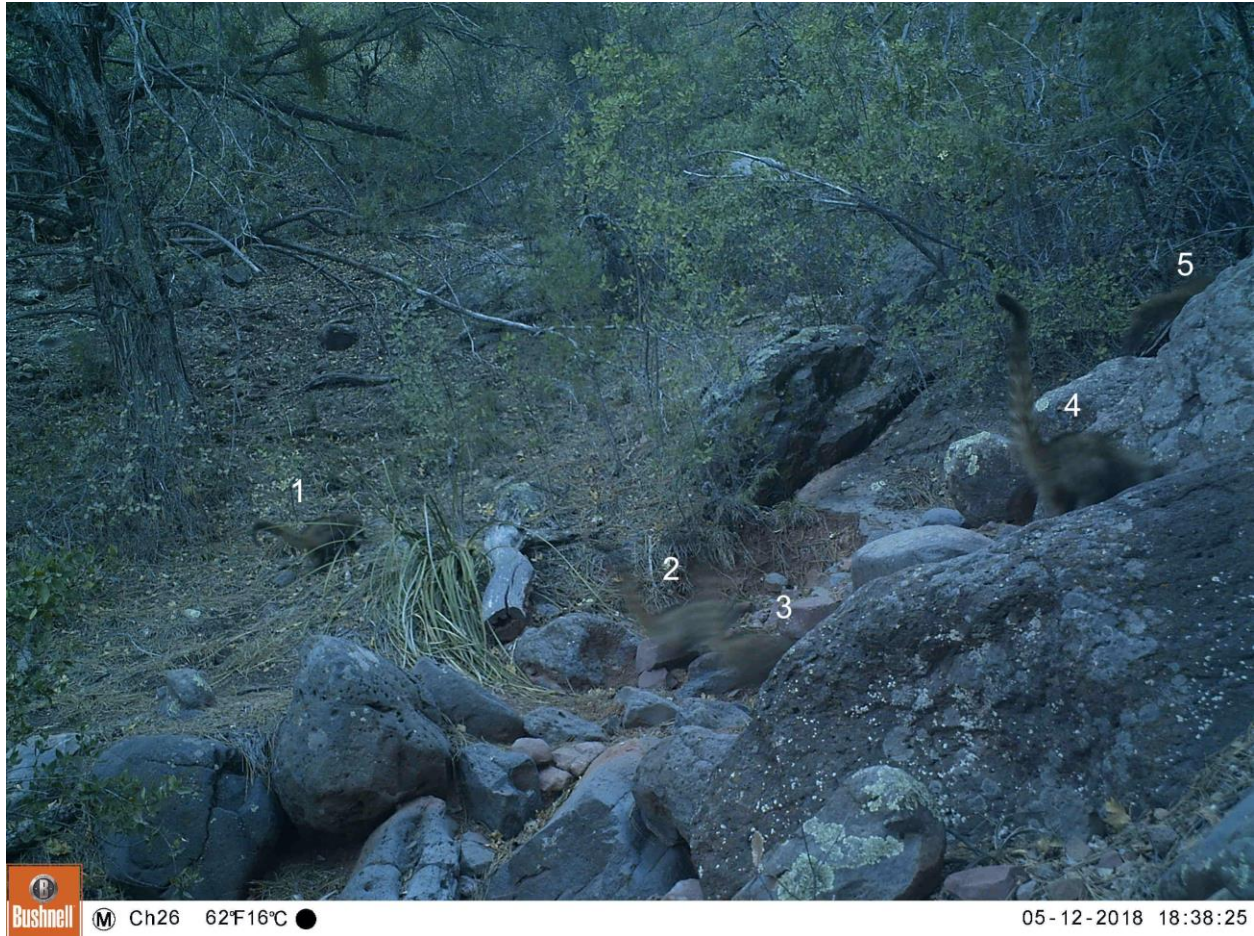

377
